# Supplementary material for: Molecular Mechanism of Gibberellins in Mesocotyl Elongation Response to Deep-Sowing Stress in Sweet Maize
Source: MDPI journal article supplement (doi:10.3390/cimb45010015), 2022-12-29
Supplement: s1 [file s1]

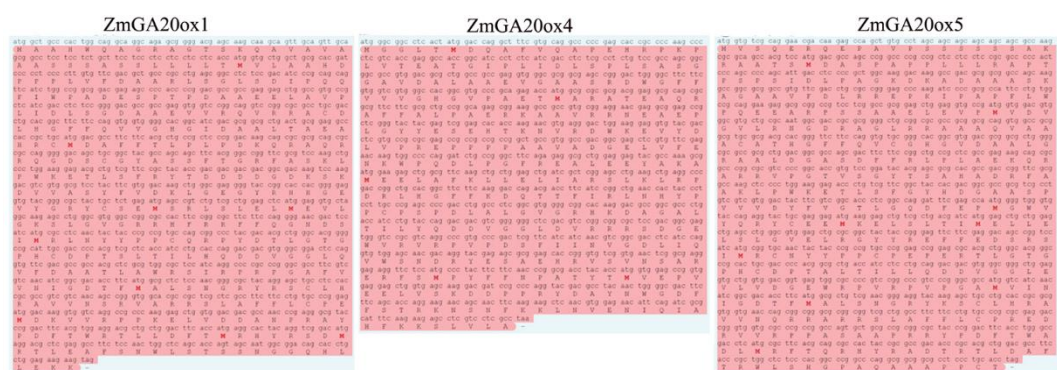

**Figure S1** Expression levels of *ZmGA20ox1* (A), *ZmGA20ox4* (B) and *ZmGA20ox5* (C) examined using qRT-PCR in Col 35S:: *ZmGA20ox1*, 35S:: *ZmGA20ox4* and 35S:: *ZmGA20ox5*. Data are means  $\pm$  SD of three replicates, and different letters indicate significant difference at  $P < 0.05$ .

| Term | Description | Sample number | Background number | P-value | Corrected P-value | Gene_id                                                                                                                                                                                                                                                                                                                                                                                                                                                                                                                                                                                                                                                                                                                                                                                                                                                                                                                                                                                                                                                                                                                                                                                                                                                                                                                                                                                                                                                                                                                                                                                                                                                                                                                                                                                                                                                                                                                                                                                               | Gene_name                                                                                                                                                                                                                                                                                                                                                                                                                                                                                                                                                                                                                                                                                                                                                                                                                                                                                                                                                                                                                                                                                                                                                                                                                                                                                                                                                                                                                                                                                                                                                                                                                                                                                                                                                                                                                                                                                                                                                                                                                                                                                                                                                                                                                                                                                                                                                                                                                                                                                                                        | KEGG_ID                                                                                                                                                                                                                                                                                                                                                                                                                                                                                                                                                                                                                                                                                                                                                                                                                                                                                                                                                                                                                                                                                                                                                                                                                                                                                                                                                                                                                                                                                                                                                                                                                                                                                                                                                                                                    |
|------|-------------|---------------|-------------------|---------|-------------------|-------------------------------------------------------------------------------------------------------------------------------------------------------------------------------------------------------------------------------------------------------------------------------------------------------------------------------------------------------------------------------------------------------------------------------------------------------------------------------------------------------------------------------------------------------------------------------------------------------------------------------------------------------------------------------------------------------------------------------------------------------------------------------------------------------------------------------------------------------------------------------------------------------------------------------------------------------------------------------------------------------------------------------------------------------------------------------------------------------------------------------------------------------------------------------------------------------------------------------------------------------------------------------------------------------------------------------------------------------------------------------------------------------------------------------------------------------------------------------------------------------------------------------------------------------------------------------------------------------------------------------------------------------------------------------------------------------------------------------------------------------------------------------------------------------------------------------------------------------------------------------------------------------------------------------------------------------------------------------------------------------|----------------------------------------------------------------------------------------------------------------------------------------------------------------------------------------------------------------------------------------------------------------------------------------------------------------------------------------------------------------------------------------------------------------------------------------------------------------------------------------------------------------------------------------------------------------------------------------------------------------------------------------------------------------------------------------------------------------------------------------------------------------------------------------------------------------------------------------------------------------------------------------------------------------------------------------------------------------------------------------------------------------------------------------------------------------------------------------------------------------------------------------------------------------------------------------------------------------------------------------------------------------------------------------------------------------------------------------------------------------------------------------------------------------------------------------------------------------------------------------------------------------------------------------------------------------------------------------------------------------------------------------------------------------------------------------------------------------------------------------------------------------------------------------------------------------------------------------------------------------------------------------------------------------------------------------------------------------------------------------------------------------------------------------------------------------------------------------------------------------------------------------------------------------------------------------------------------------------------------------------------------------------------------------------------------------------------------------------------------------------------------------------------------------------------------------------------------------------------------------------------------------------------------|------------------------------------------------------------------------------------------------------------------------------------------------------------------------------------------------------------------------------------------------------------------------------------------------------------------------------------------------------------------------------------------------------------------------------------------------------------------------------------------------------------------------------------------------------------------------------------------------------------------------------------------------------------------------------------------------------------------------------------------------------------------------------------------------------------------------------------------------------------------------------------------------------------------------------------------------------------------------------------------------------------------------------------------------------------------------------------------------------------------------------------------------------------------------------------------------------------------------------------------------------------------------------------------------------------------------------------------------------------------------------------------------------------------------------------------------------------------------------------------------------------------------------------------------------------------------------------------------------------------------------------------------------------------------------------------------------------------------------------------------------------------------------------------------------------|
|      |             |               |                   |         |                   |                                                                                                                                                                                                                                                                                                                                                                                                                                                                                                                                                                                                                                                                                                                                                                                                                                                                                                                                                                                                                                                                                                                                                                                                                                                                                                                                                                                                                                                                                                                                                                                                                                                                                                                                                                                                                                                                                                                                                                                                       |                                                                                                                                                                                                                                                                                                                                                                                                                                                                                                                                                                                                                                                                                                                                                                                                                                                                                                                                                                                                                                                                                                                                                                                                                                                                                                                                                                                                                                                                                                                                                                                                                                                                                                                                                                                                                                                                                                                                                                                                                                                                                                                                                                                                                                                                                                                                                                                                                                                                                                                                  | zma:103647946 zma:103648032 zma:100192007 zma:100281486 zma:103636504 zma:100289672 zma:103633580 zma:541998 zma:100284071 zma:541632 zma:103636222 zma:100284582 zma:100283118 zma:100276099 zma:100284778 zma:103384222 zma:10000214 zma:100333226 zma:5421352 zma:541624 zma:103638597 zma:103634514 zma:327352 zma:100191784 zma:100284262 zma:103646418 zma:100281419 zma:100191280 zma:100284527 zma:103646443 zma:100283387 zma:100274512 zma:100383126 zma:103632200 zma:100281868 zma:103642166 zma:100280277 zma:100280445 zma:100381349 zma:103641361 zma:103631132 zma:100282657 zma:100283752 zma:100277481 zma:100292412 zma:100274111 zma:100272726 zma:103631918 zma:100274141 zma:103645108 zma:100286028 zma:100383950 zma:103637689 zma:100284599 zma:100279505 zma:100274569 zma:100193967 zma:100279520 zma:100280600 zma:103638497 zma:542536 zma:100279789 zma:103626859 zma:103632809 zma:100281196 zma:100216870 zma:103650192 zma:100278494 zma:100274580 zma:100283820 zma:100272820 zma:541625 zma:100285909 zma:103645551 zma:100383078 zma:103627198 zma:100383453 zma:100283932 zma:100193827 zma:103626700 zma:541642 zma:100284541 zma:100216617 zma:103630348 zma:103630796 zma:100276381 zma:100286217 zma:100274750 zma:541633 zma:109944035 zma:103642161 zma:100284002 zma:100282779 zma:103642983 zma:100216590 zma:100502387 zma:100282511 zma:100384798 zma:100283929 zma:100283610 zma:103649392 zma:100192531 zma:100191581 zma:100285000 zma:100278636 zma:103624647 zma:100273694 zma:541627 zma:100194025 zma:542536 zma:100201609 zma:100284736 zma:100271448 zma:100285294 zma:100381959 zma:100281448 zma:100192658 zma:103649787 zma:541638 zma:100279873 zma:100272242 zma:100283313 zma:100283352 zma:100381666 zma:100384381 zma:100383759 zma:541613 |
|      |             |               |                   |         |                   | Zm00001d007188 Zm00001d007395 Zm00001d026398 Zm00001d018326 Zm00001d012401 Zm00001d028974 Zm00001d022520 Zm00001d038210 Zm00001d028401 Zm00001d022442 Zm00001d017121 Zm00001d015178 Zm00001d002410 Zm00001d028936 Zm00001d027899 Zm00001d020814 Zm00001d019696 Zm00001d001945 Zm00001d018738 Zm00001d026594 Zm00001d047848 Zm00001d028793 Zm00001d031786 Zm00001d038498 Zm00001d003976 Zm00001d003601 Zm00001d003267 Zm00001d022139 Zm00001d038296 Zm00001d008201 Zm00001d022017 Zm00001d038326 Zm00001d041350 Zm00001d019384 Zm00001d047705 Zm00001d028540 Zm00001d016977 Zm00001d006753 Zm00001d042014 Zm00001d024783 Zm00001d043244 Zm00001d042886 Zm00001d005293 Zm00001d022542 Zm00001d002143 Zm00001d006477 Zm00001d011878 Zm00001d018734 Zm00001d012707 Zm00001d051889 Zm00001d013071 Zm00001d014294 Zm00001d039021 Zm00001d010082 Zm00001d000408 Zm00001d010411 Zm00001d002711 Zm00001d003642 Zm00001d018973 Zm00001d005102 Zm00001d017961 Zm00001d047563 Zm00001d015845 Zm00001d002606 Zm00001d012640 Zm00001d033119 Zm00001d048405 Zm00001d031050 Zm00001d049313 Zm00001d048406 Zm00001d043151 Zm00001d009296 Zm00001d005144 Zm00001d050365 Zm00001d005204 Zm00001d052543 Zm00001d014582 Zm00001d040536 Zm00001d009747 Zm00001d026490 Zm00001d012128 Zm00001d014297 Zm00001d046248 Zm00001d005018 Zm00001d028165 Zm00001d039163 Zm00001d0022139 Zm00001d024653 Zm00001d002903 Zm00001d005768 Zm00001d0025143 Zm00001d026530 Zm00001d0026262 Zm00001d002659 Zm00001d042634 Zm00001d028436 Zm00001d042431 Zm00001d047032 Zm00001d007484 Zm00001d042463 Zm00001d016188 Zm00001d007484 Zm00001d017480 Zm00001d037774 Zm00001d042809 Zm00001d036215 Zm00001d014682 Zm00001d002533 Zm00001d025020 Zm00001d015178 Zm00001d049492 Zm00001d043117 Zm00001d002039 Zm00001d010158 Zm00001d031445 Zm00001d034463 Zm00001d018141 Zm00001d034160 Zm00001d004357 Zm00001d0191521 Zm00001d046751 Zm00001d0051911 Zm00001d048093 Zm00001d016277 Zm00001d009626 Zm00001d0054920 Zm00001d026477 Zm00001d001865 | ELF transcription factor 2 - bZIP-transcription factor 113 - protein phosphatase homolog ethylene isomerase-like2 ELF transcription factor 8 auxin import carrier1 - brassinosteroid insensitive1a bZIP-transcription factor 4 - bZIP-transcription factor 32 Zm1-transcription factor 25 DRE-transcription factor 28 cyclin10 ARF-transcription factor 4 pathogenesis related protein1 cyclin10 response regulator2 - ARF-transcription factor 23 Aux IAA-transcription factor 4 AB13-VP1-transcription factor 17 bHLH-transcription factor 43 - bZIP-transcription factor 37 Aux IAA-transcription factor 34 - bZIP2 serine threonine protein kinase 11 - ARF-transcription factor 29 - - bHLH transcription factor 117 - protein phosphatase homolog3 cyclin11 bZIP-transcription factor 54 bZIP-transcription factor 27 E2F-transcription factor 7 - Aux IAA-transcription factor 22 Aux IAA-transcription factor 19 - - Aux IAA-transcription factor 38 - Aux IAA-transcription factor 32 - histidine-containing phosphotransfer protein1 ethylene insensitive-like1 - Aux IAA-transcription factor 3 GRAS-transcription factor 46 Zm1-transcription factor 18 Aux IAA-transcription factor 7 ARB8 - B-transcription factor 1 Aux IAA-transcription factor 15 phosphatase-related protein1 histidine-containing phosphotransfer protein2 Zm1-transcription factor 35 auxin import carrier2 bZIP-transcription factor 79 - bHLH3 transcription factor 48 protein phosphatase homolog1 Sals2 serine threonine kinase5 ARB-8-transcription factor 7 histidine kinase Zm1-transcription factor 14 bZIP-transcription factor 48 - protein phosphatase homolog1 Zm1-transcription factor 33 Zm1-transcription factor 33 cytokinin response regulator7 - - Sals2 serine threonine protein kinase7 - ARF-transcription factor 11 - ARB-8-transcription factor 5 - dwarf plant8 Aux IAA-transcription factor 28 auxin transporter-like1 HAP kinase7 - ethylene receptor homolog2 - histidine-containing phosphotransfer protein3 bZIP-transcription factor 102 Zm1-transcription factor 32 bZIP-transcription factor 25 ELF-transcription factor 3 Aux IAA-transcription factor 5 Aux IAA-transcription factor 24 bZIP-transcription factor 107 protein phosphatase homolog1 G2-like transcription factor 24 bZIP-transcription factor 70 Aux IAA-transcription factor 18 - Aux IAA-transcription factor 23 protein phosphatase homolog4 ARF2 E2F6-transcription factor 58 Zm1-transcription factor 34 cytokinin response regulator1 |                                                                                                                                                                                                                                                                                                                                                                                                                                                                                                                                                                                                                                                                                                                                                                                                                                                                                                                                                                                                                                                                                                                                                                                                                                                                                                                                                                                                                                                                                                                                                                                                                                                                                                                                                                                                            |

**Figure S2** Hormone signal transduction process involved in hormone-related DEGs.

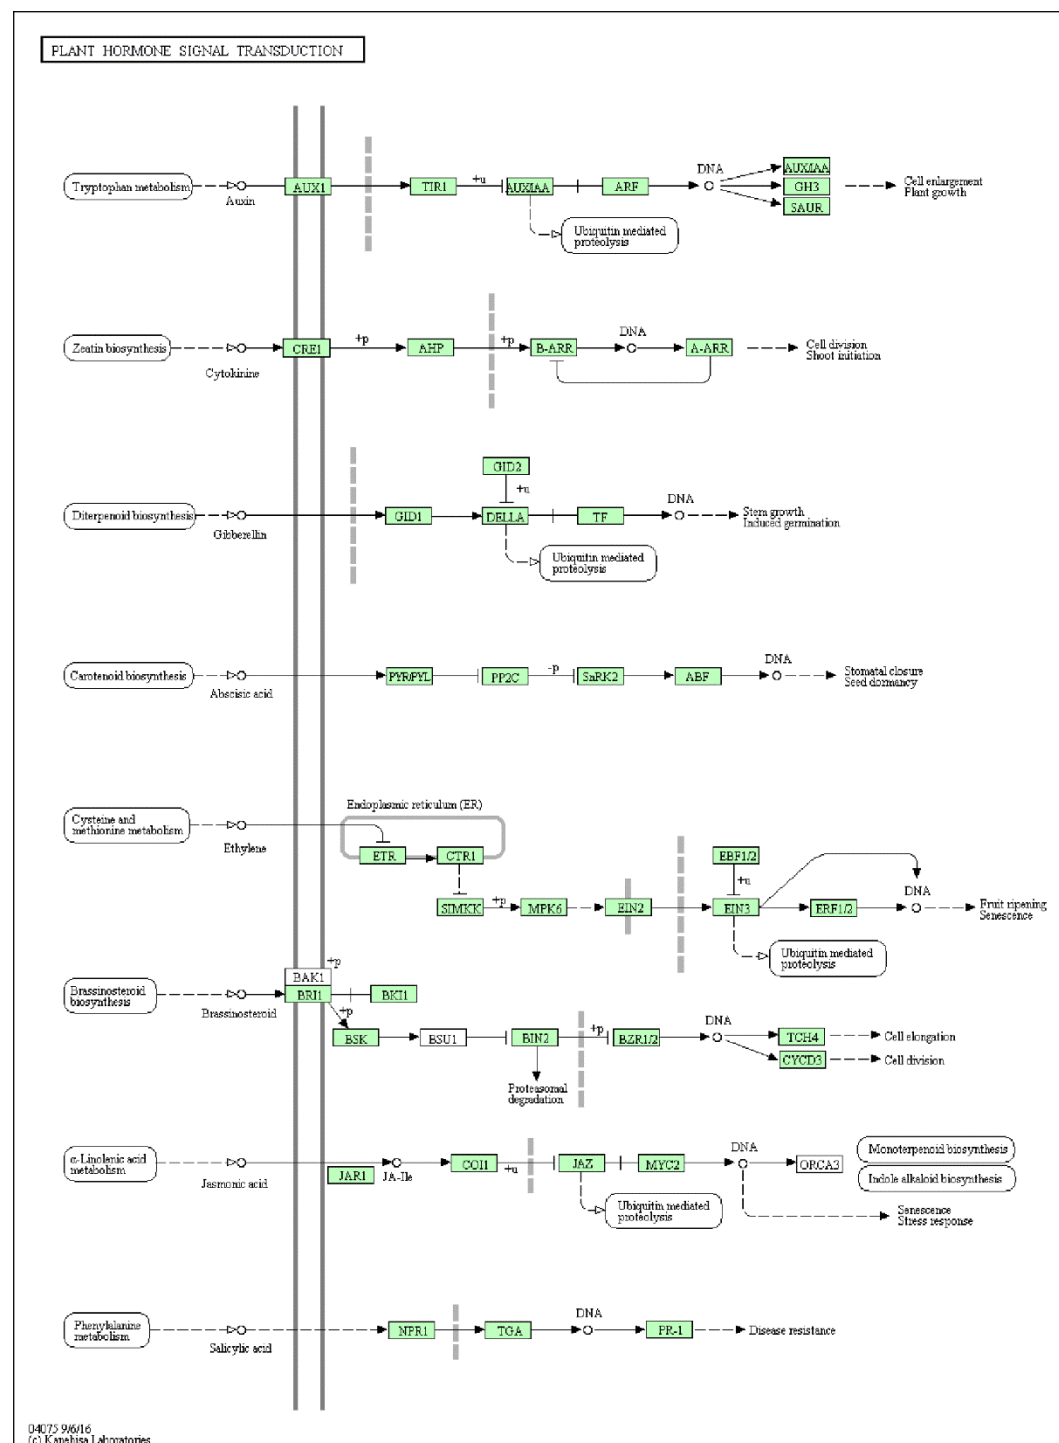

**Figure S3** Hormone-related DEGs in KEGG annotations.

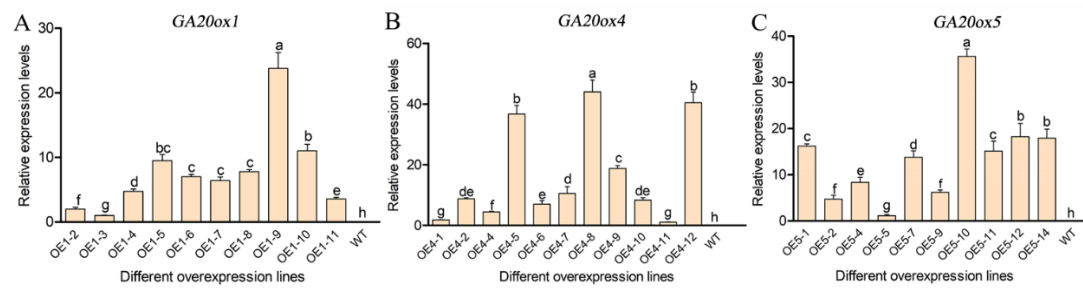

**Figure S4** Nucleotide and amino acid sequences of ZmGA20ox1, ZmGA20ox4 and ZmGA20ox5.
