# Supplementary material for: Molecular Mechanism of Gibberellins in Mesocotyl Elongation Response to Deep-Sowing Stress in Sweet Maize
Source: MDPI journal article supplement (doi:10.3390/cimb45010015), 2022-12-29
Supplement: s1 [file s1]

Table S1 Information of primers used in qRT-PCR.

| Genome ID          | Gene name      | Forward primer sequence | Reverse primer sequence |
|--------------------|----------------|-------------------------|-------------------------|
| Zm00001d0<br>37565 | <i>GA2ox1</i>  | GAGTATGTGGGAGCGATGAG    | GGTGGAGGGTAGTGGTTTATC   |
| Zm00001d0<br>02999 | <i>GA2ox2</i>  | ACAACCTGTACAAGAGCGTG    | CGAAGGTGAAGTCTCTGTACG   |
| Zm00001d0<br>43411 | <i>GA2ox3</i>  | GAGGTTCAGGAGCGTGAAG     | CCGCGAAGTAGATGAAGGAAAC  |
| Zm00001d0<br>17294 | <i>GA2ox4</i>  | AACAGATACAAGAGCGTGGAG   | GAAAGTAGGCGACGGAGTAG    |
| Zm00001d0<br>37724 | <i>GA2ox6</i>  | AAACCACCCTCCCAATCATC    | TCGCCGACATTGACGAAG      |
| Zm00001d0<br>38695 | <i>GA2ox7</i>  | GGGTGTCCATGATCTACTTCG   | GTAGTCGCCCCATGTGAAG     |
| Zm00001d0<br>08909 | <i>GA2ox9</i>  | CTGCGGGTGAACCACTAC      | GAGCACCGAGATGATCTGC     |
| Zm00001d0<br>34898 | <i>GA20ox1</i> | CTACTTCGTGGACAAGCTGG    | ACAGACGGCTCATCTCAGAG    |
| Zm00001d0<br>07894 | <i>GA20ox2</i> | AAAATGCAGGGAGGTGTACC    | TGGTTCAGCCGCATGAC       |
| Zm00001d0<br>13725 | <i>GA20ox4</i> | CTGGTGAGCAAGGACGATC     | TTGAAATGCGCGATCTGAATG   |
| Zm00001d0<br>12212 | <i>GA20ox5</i> | CTCCCCTGTTACAAATACCCC   | CTGGCTCTTGTCGTTTCCTG    |

Table S2. Transcriptome analysis differences of DEGs associated with GA synthesis in 1 cm and 10 cm sowing depth at the 15-day seedling stage (10 cm/1 cm).

| <b>Swissprot</b>   | <b>Gene-id</b>        | <b>log<sub>2</sub>Fold</b> | <b>pvalue</b> | <b>padj</b> |
|--------------------|-----------------------|----------------------------|---------------|-------------|
| <b>Description</b> |                       | <b>Change</b>              |               |             |
| <i>ZmGA2ox1</i>    | Zm00001d037565        | 4.668910698                | 0.000706654   | 0.003521947 |
| <i>ZmGA2ox2</i>    | Zm00001d002999        | -2.532823236               | 8.02E-28      | 1.30E-25    |
| <i>ZmGA2ox3</i>    | Zm00001d043411        | -1.60336952                | 1.41E-07      | 1.78E-06    |
| <i>ZmGA2ox4</i>    | Zm00001d017294        | -2.395064914               | 4.83E-16      | 2.36E-14    |
| <i>ZmGA2ox6</i>    | Zm00001d037724        | -2.479127089               | 2.71E-31      | 5.49E-29    |
| <i>ZmGA2ox7</i>    | Zm00001d038695        | 3.784351874                | 0.000177668   | 0.001067743 |
| <i>ZmGA2ox9</i>    | Zm00001d008909        | -4.733853057               | 8.24E-81      | 3.04E-77    |
| <i>ZmGA20ox1</i>   | Zm00001d034898        | -1.724877624               | 1.42E-14      | 5.83E-13    |
| <i>ZmGA20ox2</i>   | Zm00001d007894        | -2.49328791                | 0.004483223   | 0.016943248 |
| <i>ZmGA20ox4</i>   | <i>Zm00001d013725</i> | -2.110525696               | 0.000105074   | 0.000672358 |
| <i>ZmGA20ox5</i>   | Zm00001d012212        | -1.909198573               | 1.89E-10      | 4.05E-09    |
